# Supplementary material for: Stable Fe(iii) phenoxyimines as selective and robust CO2/epoxide coupling catalysts
Source: Royal Society of Chemistry journal article supplement (doi:10.1039/c8dt02919a), 2018-01-01
Supplement: c8dt02919a1.pdf [file c8dt02919a1.pdf]

## Supporting Information

### **Stable Fe(III) phenoxyimines as selective and robust CO<sub>2</sub>/epoxide coupling catalysts**

Eszter Fazekas,<sup>a</sup> Gary S. Nichol,<sup>a</sup> Michael P. Shaver<sup>a</sup> and Jennifer A. Garden\*<sup>a</sup>

<sup>a</sup>EaStCHEM School of Chemistry, University of Edinburgh, Edinburgh, EH9 3FJ, UK.

#### Table of contents

|     |                                                                                                       |    |
|-----|-------------------------------------------------------------------------------------------------------|----|
| 1.  | <sup>1</sup> H and <sup>13</sup> C NMR spectra of ligands L1-L3 .....                                 | 2  |
| 2.  | HRMS spectra of complexes C1-C3 .....                                                                 | 5  |
| 3.  | <sup>1</sup> H NMR spectra of crude CO <sub>2</sub> /epoxide coupling reaction mixtures .....         | 6  |
| 4.  | Kinetic plot of CO <sub>2</sub> /propylene oxide coupling reaction (0.01 mol% catalyst loading) ..... | 9  |
| 5.  | Data for CO <sub>2</sub> /cyclohexene oxide coupling reactions.....                                   | 9  |
| 6.  | Comparison with other Fe complexes for CO <sub>2</sub> /epoxide coupling in the literature.....       | 12 |
| 7.  | Lower temperature CO <sub>2</sub> /propylene oxide coupling experiments .....                         | 13 |
| 8.  | Kinetic data for the synthesis of propylene carbonate catalysed by C3. ....                           | 13 |
| 9.  | Catalyst decomposition studies <i>via</i> FT-IR spectroscopy .....                                    | 14 |
| 10. | X-ray data for Complexes C1 – C3.....                                                                 | 14 |
| 11. | References.....                                                                                       | 16 |

1.  $^1\text{H}$  and  $^{13}\text{C}$  NMR spectra of ligands L1-L3

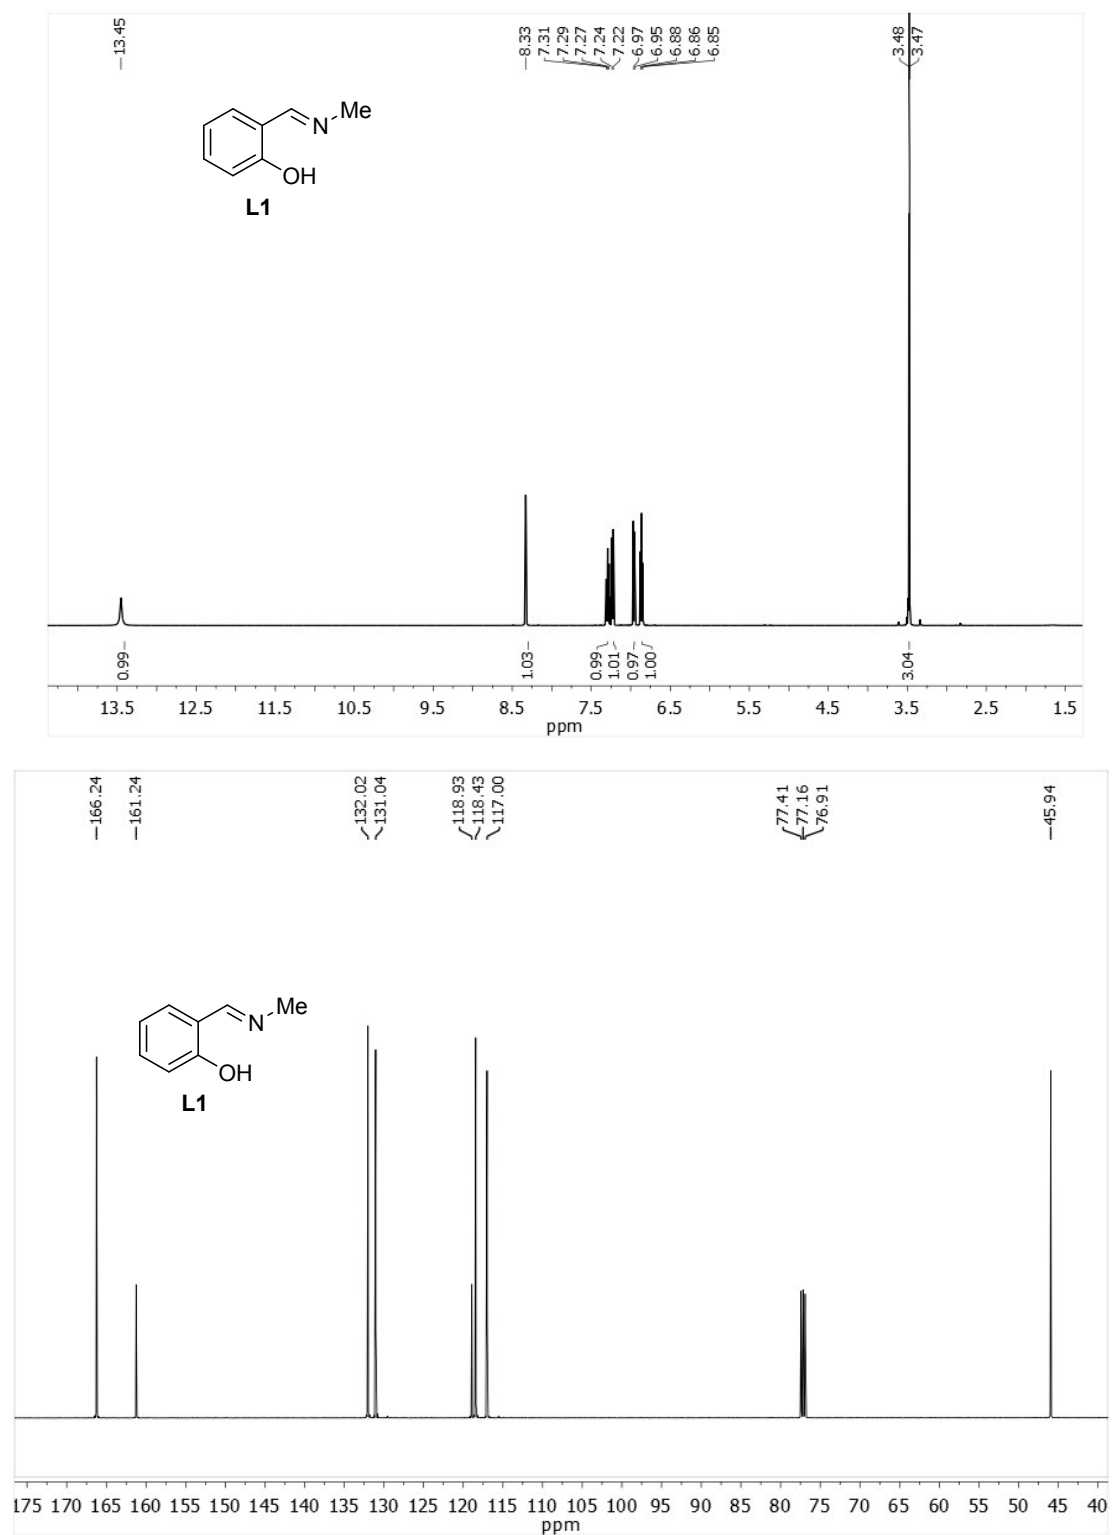

Figure S1  $^1\text{H}$  and  $^{13}\text{C}$  NMR spectra of L1 in  $\text{CDCl}_3$  at  $20^\circ\text{C}$ .

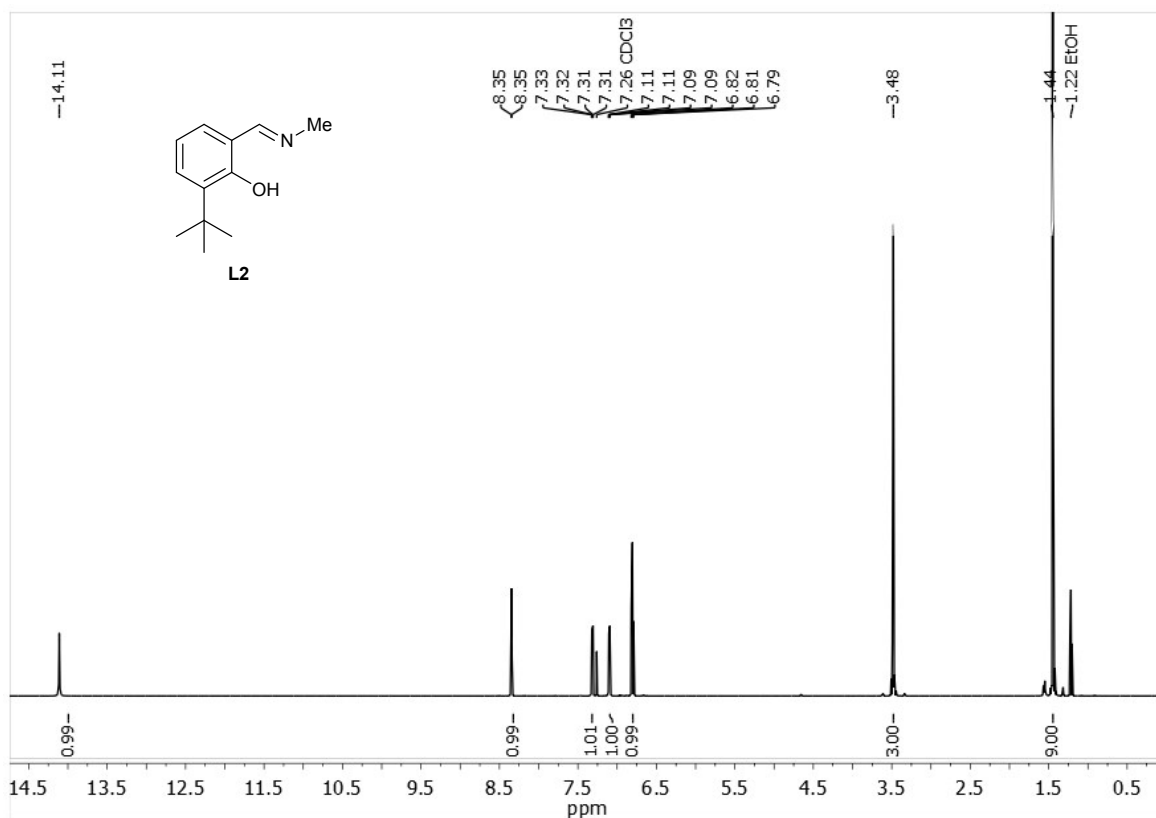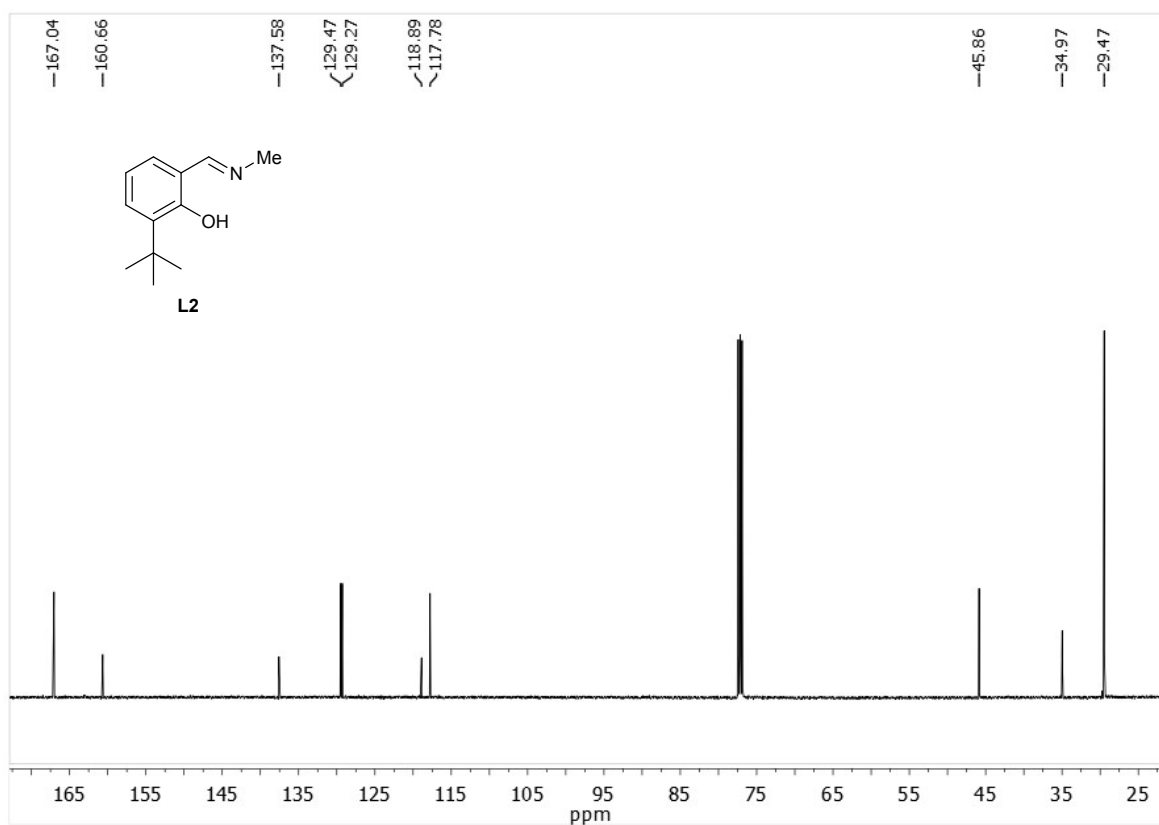

Figure S2 <sup>1</sup>H and <sup>13</sup>C NMR spectra of L2 in CDCl<sub>3</sub> at 20°C.

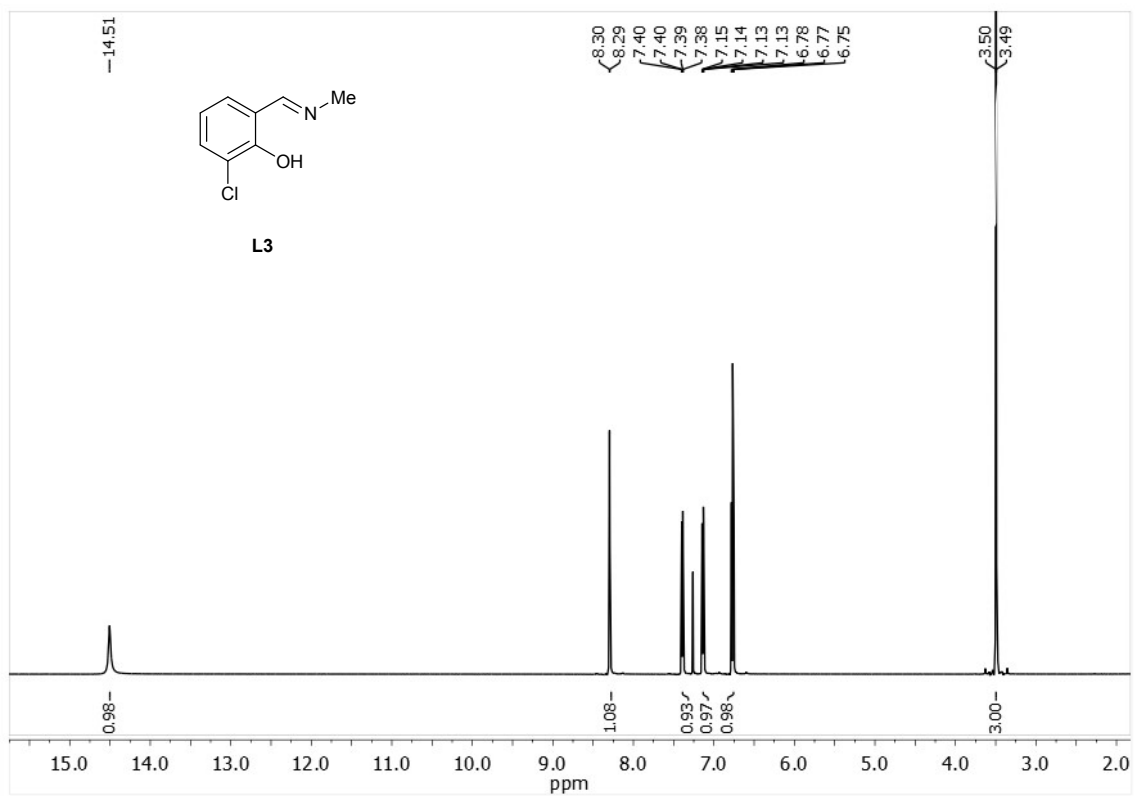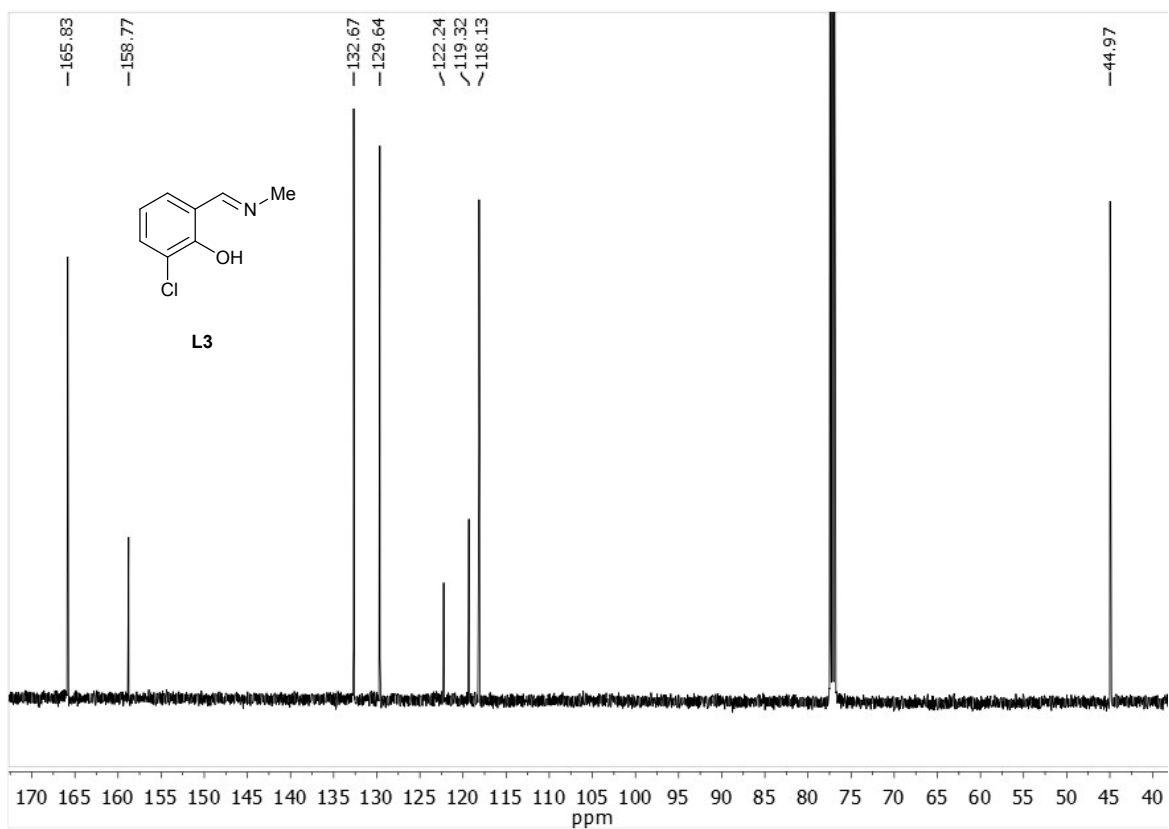

Figure S3 <sup>1</sup>H and <sup>13</sup>C NMR spectra of **L3** in CDCl<sub>3</sub> at 20°C.

## 2. HRMS spectra of complexes C1-C3

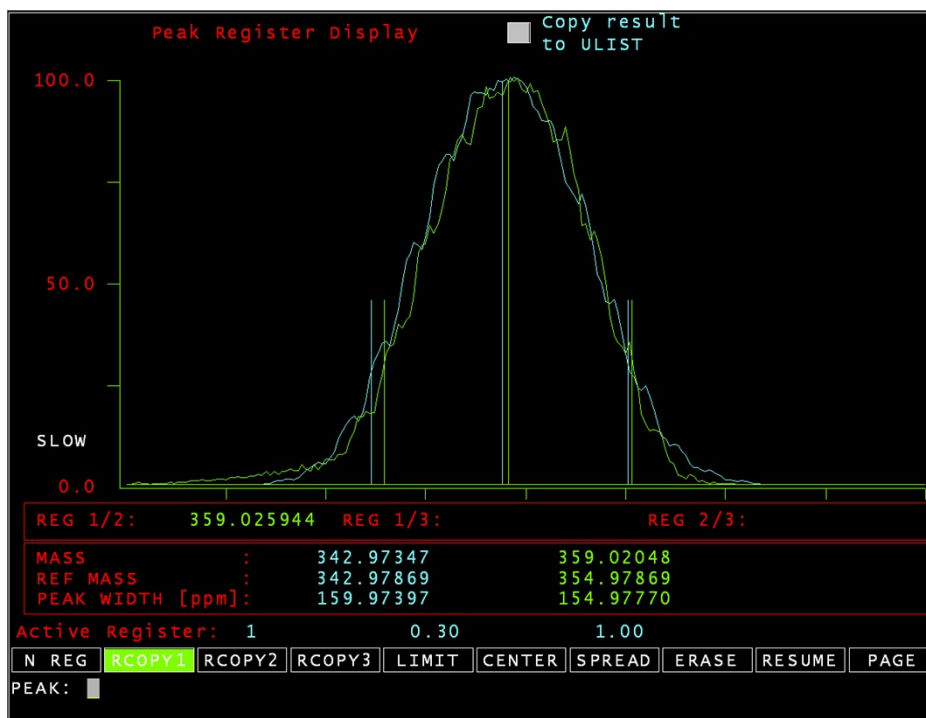

Figure S4 HRMS peak of C1.

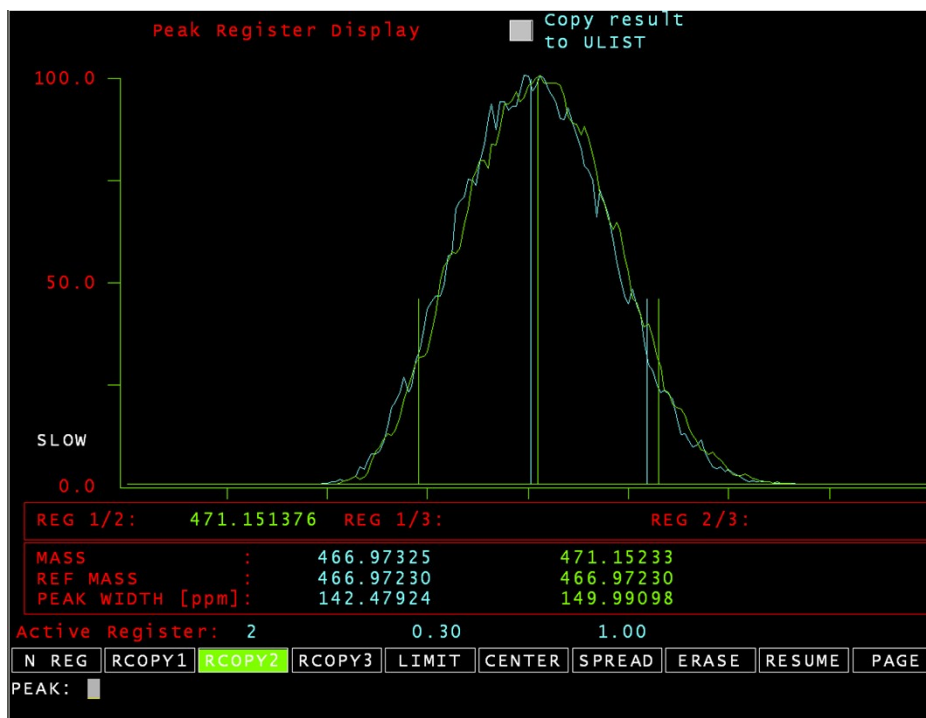

Figure S5 HRMS peak of C2.

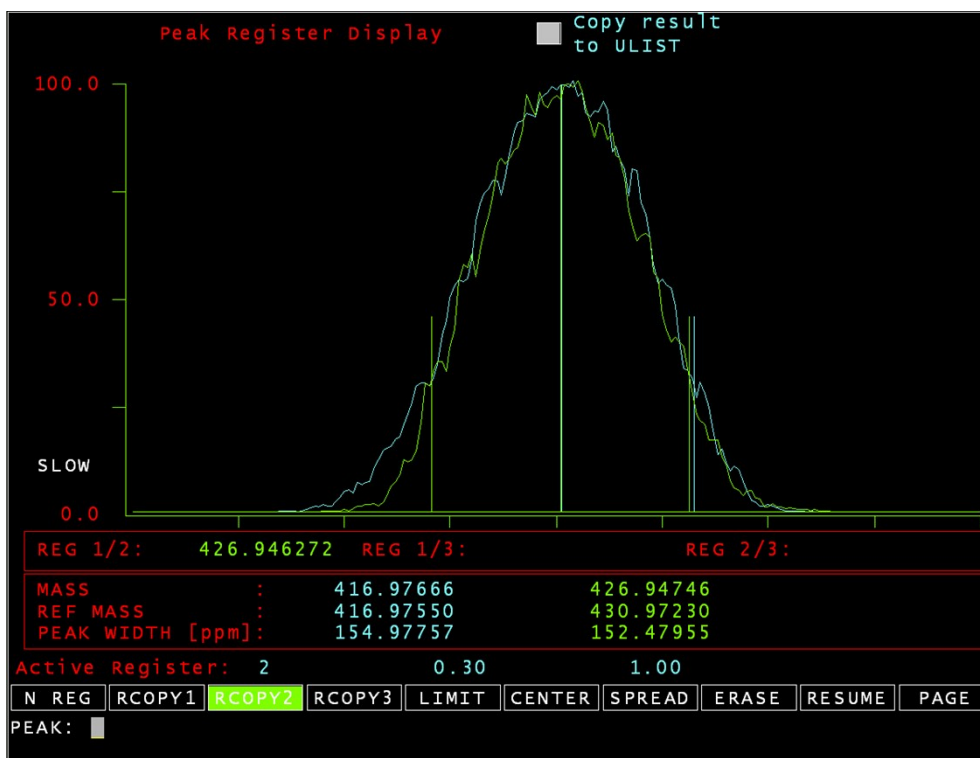

Figure S6 HRMS peak of C3.

### 3. <sup>1</sup>H NMR spectra of crude CO<sub>2</sub>/epoxide coupling reaction mixtures

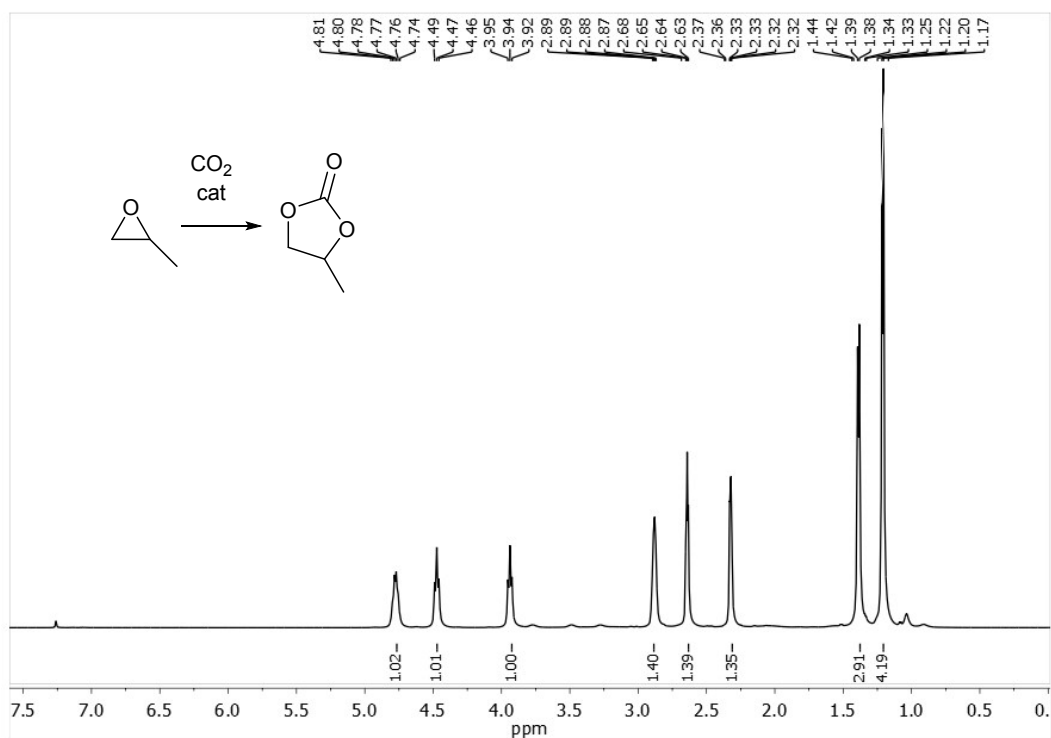

Figure S7 Typical <sup>1</sup>H NMR spectrum of a CO<sub>2</sub>/propylene oxide coupling crude reaction mixture in CDCl<sub>3</sub> at 20°C. Conversion was determined *via* integration of the CH<sub>3</sub> propylene carbonate (product) peak at 1.37 ppm against the CH<sub>3</sub> propylene oxide (starting material) peak at 1.20 ppm.

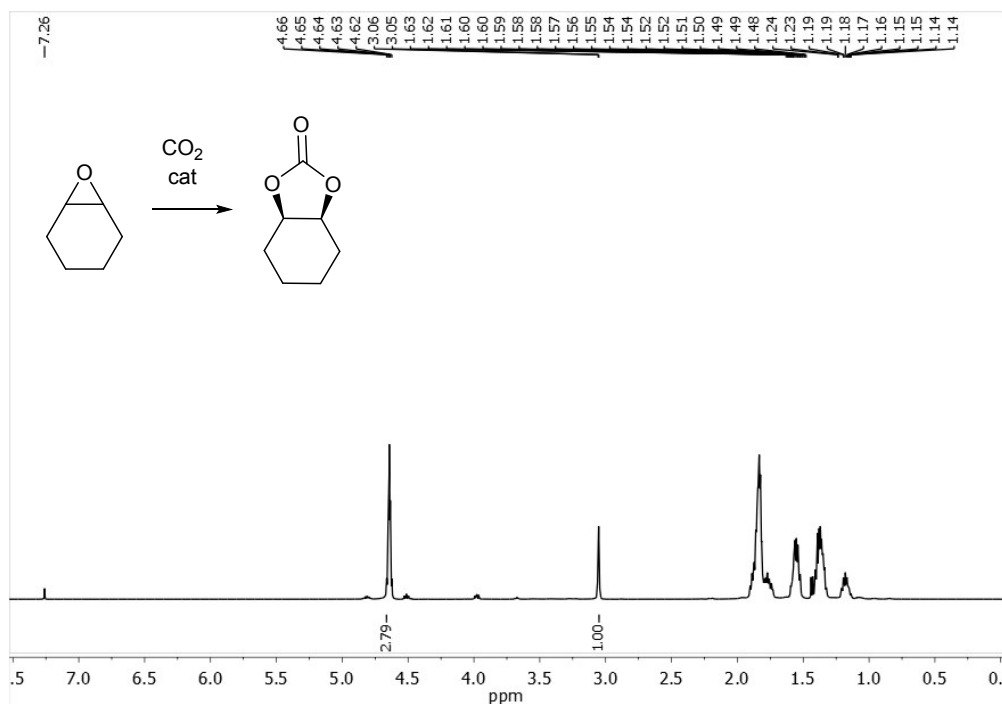

**Figure S8** Typical  $^1\text{H}$  NMR spectrum of a  $\text{CO}_2$ /cyclohexene oxide coupling crude reaction mixture in  $\text{CDCl}_3$  at  $20^\circ\text{C}$ . Conversion was determined *via* integration of the  $\text{OCHCH}_2\text{CH}_2$  cyclohexene carbonate (product) peak at 4.66 ppm against the  $\text{OCHCH}_2\text{CH}_2$  cyclohexene oxide (starting material) peak at 3.09 ppm.<sup>1</sup>

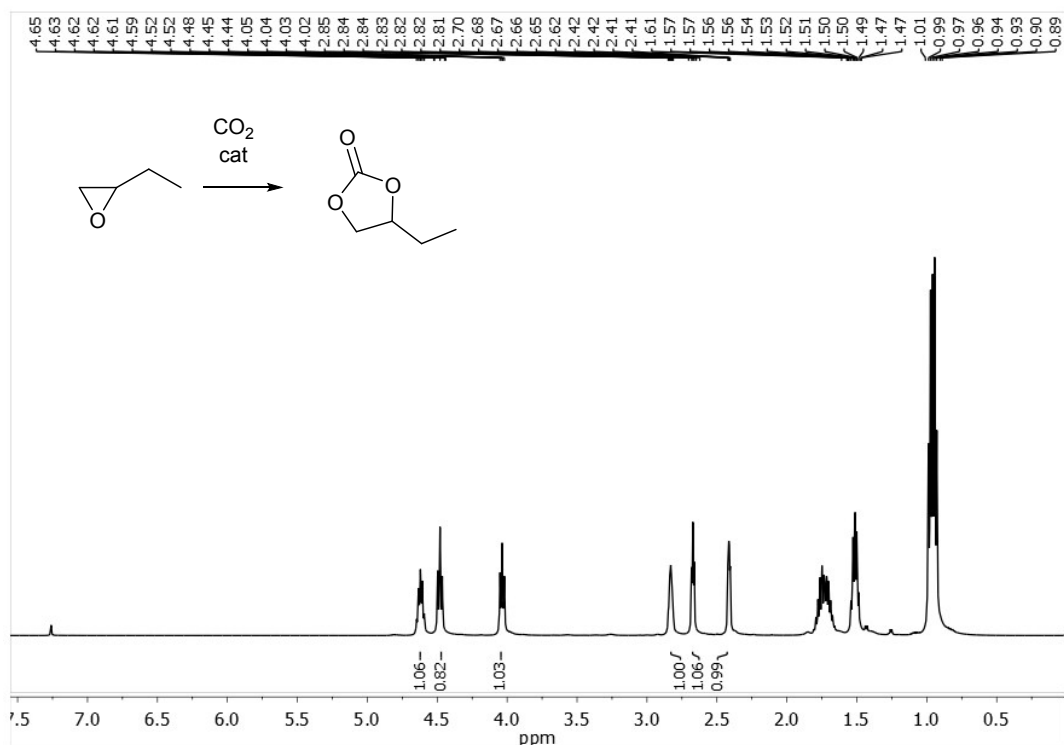

**Figure S9** Typical  $^1\text{H}$  NMR spectrum of a  $\text{CO}_2$ /1,2-epoxybutane coupling crude reaction mixture in  $\text{CDCl}_3$  at  $20^\circ\text{C}$ . Conversion was determined *via* integration of the  $\text{OCH}$  butylene carbonate (product) peak at 4.63 ppm against the  $\text{OCHCH}_2\text{CH}_2$  1,2-epoxybutane (starting material) peak at 2.83 ppm.

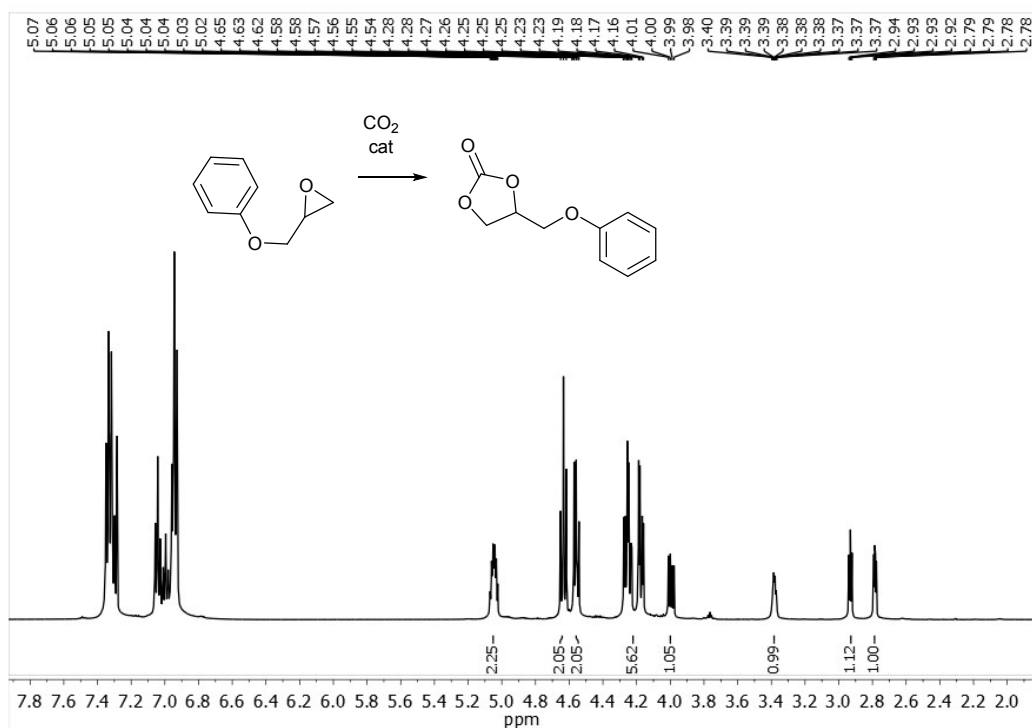

**Figure S10** Typical <sup>1</sup>H NMR spectrum of a CO<sub>2</sub>/1,2-epoxy-3-phenoxypropane coupling crude reaction mixture in CDCl<sub>3</sub> at 20°C. Conversion was determined *via* integration of the OCH carbonate (product) peak at 4.25 ppm against the OCHC 1,2-epoxy-3-phenoxypropane (starting material) peak at 3.39 ppm.

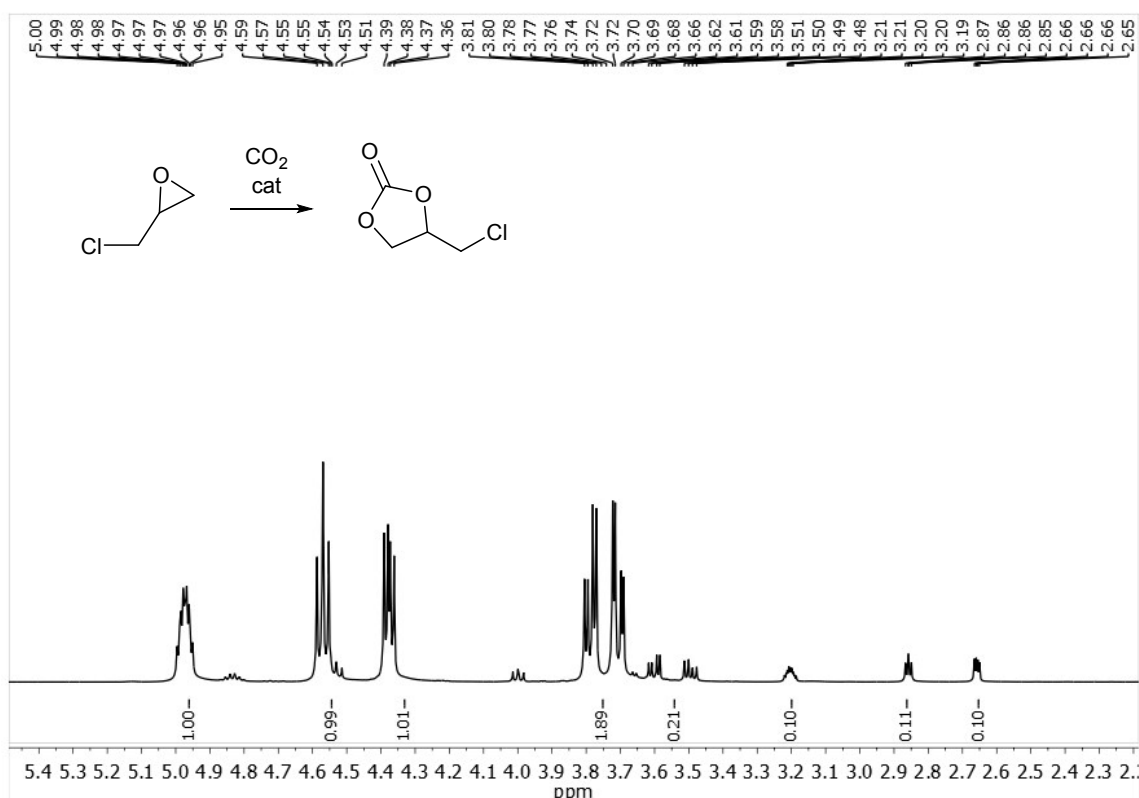

**Figure S11** Typical <sup>1</sup>H NMR spectrum of a CO<sub>2</sub>/epichlorohydrin coupling crude reaction mixture in CDCl<sub>3</sub> at 20°C. Conversion was determined *via* integration of the OCH carbonate (product) peak at 4.98 ppm against the OCH epichlorohydrin (starting material) peak at 3.21 ppm.<sup>2</sup>



#### 4. Kinetic plot of CO<sub>2</sub>/propylene oxide coupling reaction (0.01 mol% catalyst loading)

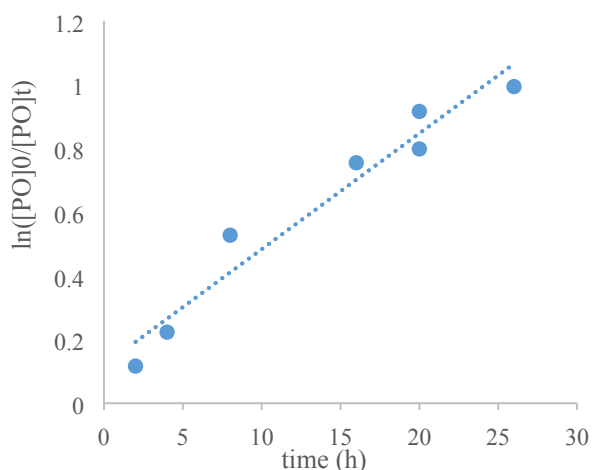

**Figure S12** Kinetic plot for the synthesis of propylene carbonate using **C3** with 10000 equivalents of substrate. Conditions: 100 ml stainless steel autoclaves, 20 bar CO<sub>2</sub> pressure, 120°C, neat. Conversion was determined using <sup>1</sup>H NMR spectra of crude reaction mixtures.

#### 5. Data for CO<sub>2</sub>/cyclohexene oxide coupling reactions

**Table S1** Synthesis of cyclohexene carbonate from CO<sub>2</sub> and cyclohexene oxide catalysed by complex **C3**.

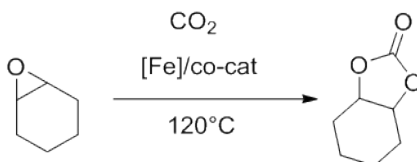

| Entry | Complex   | t (h) | [CHO]/[Fe] | Co-catalyst | [Co-cat]/[Fe] | Conv. (%) | TON  | TOF (h <sup>-1</sup> ) |
|-------|-----------|-------|------------|-------------|---------------|-----------|------|------------------------|
| 1     | <b>C3</b> | 2     | 2000       | TBABr       | 2             | 8         | 160  | 80                     |
| 2     | <b>C3</b> | 24    | 2000       | TBABr       | 2             | 56        | 1120 | 47                     |
| 3     | <b>C3</b> | 48    | 2000       | TBABr       | 2             | 74        | 1480 | 31                     |

Conditions: 100 ml stainless steel autoclaves, 20 bar CO<sub>2</sub> pressure, 120°C, neat. Conversion was determined using <sup>1</sup>H NMR spectra of crude reaction mixtures.

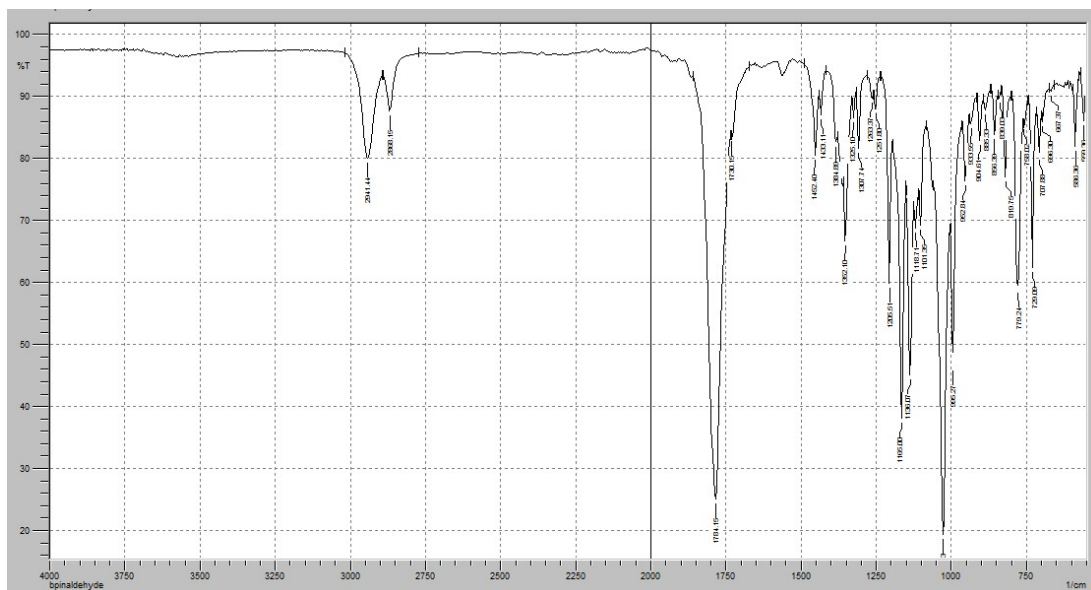

**Figure S13** IR spectrum of a crude CO<sub>2</sub>/cyclohexene oxide coupling reaction mixture. The absence of peaks in the 1014 cm<sup>-1</sup>, 1239-1176 cm<sup>-1</sup>, and 1731-1787 cm<sup>-1</sup> bands indicates no polymer formation.<sup>3</sup>

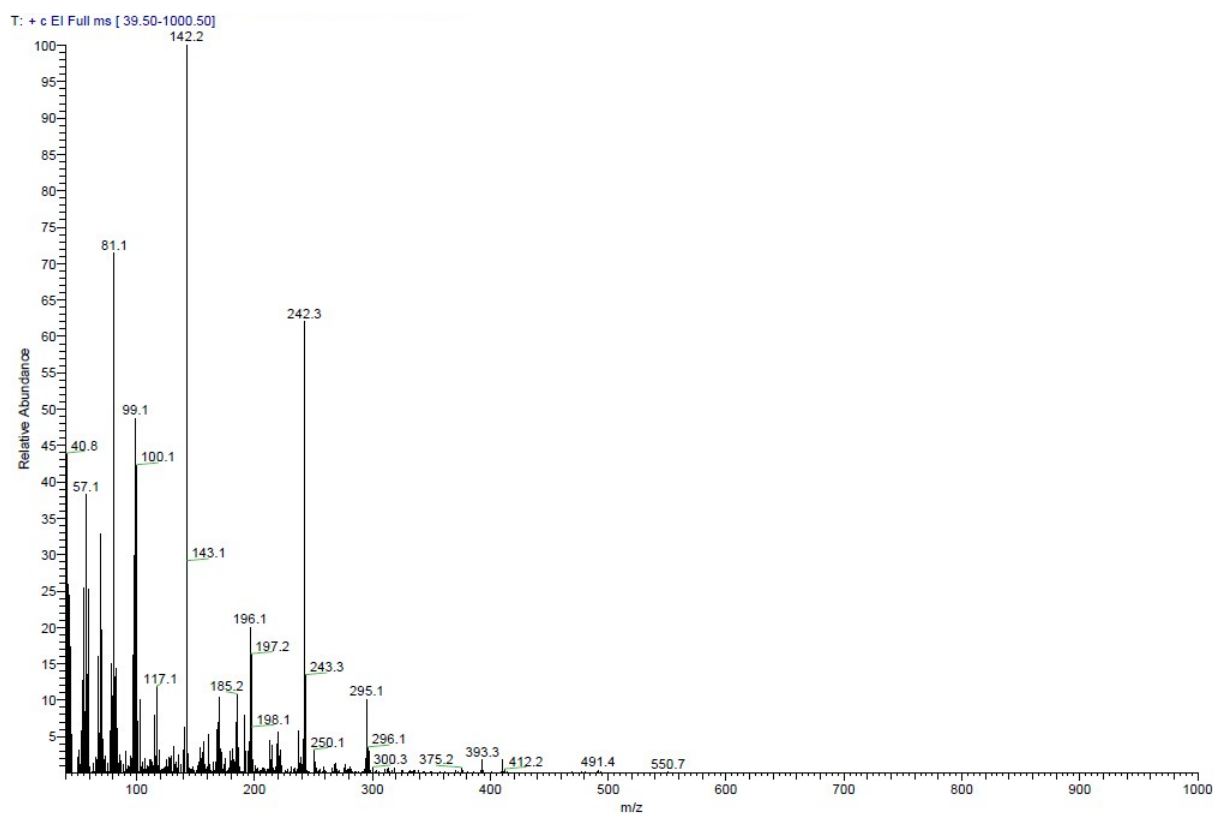

**Figure S14** EI mass spectrum of a crude CO<sub>2</sub>/cyclohexene oxide coupling reaction mixture. The absence of peaks above 550 m/z value indicates no polymer formation.

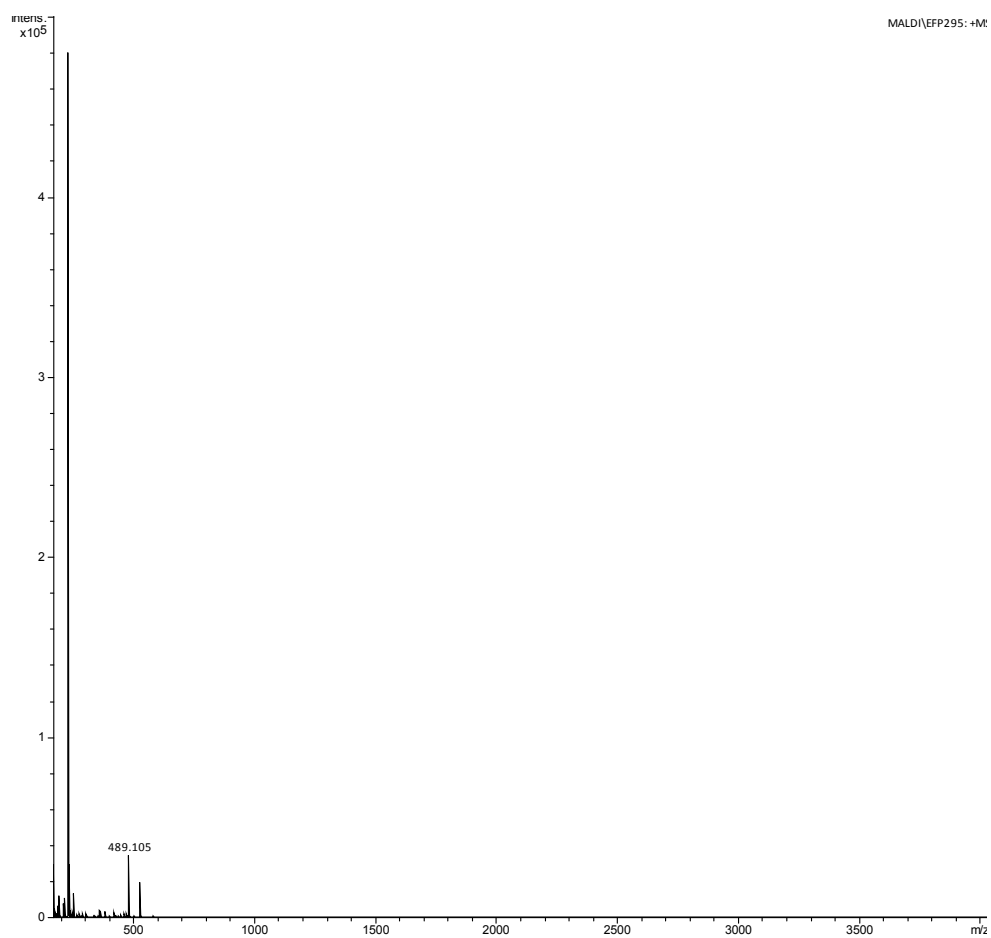

**Figure S15** MALDI spectrum of a crude CO<sub>2</sub>/cyclohexene oxide coupling reaction mixture. The absence of peaks above 538 m/z value indicates no polymer formation.

## 6. Comparison with other Fe complexes for CO<sub>2</sub>/epoxide coupling in the literature

**Table S2** Selected literature data for the synthesis of propylene carbonate and cyclohexene carbonate.

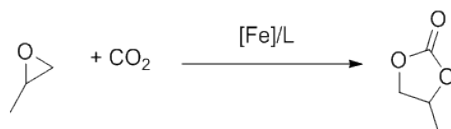

| Entry                  | Fe/co-cat/PO | T (°C) | p (bar) | t (h) | Conv. (%) | TON  | TOF (h <sup>-1</sup> ) |
|------------------------|--------------|--------|---------|-------|-----------|------|------------------------|
| <b>1<sup>a</sup></b>   | 1/2/2000     | 120    | 20      | 1     | 44        | 880  | 880                    |
| <b>2<sup>4</sup></b>   | 1/5/1000     | 35     | 1       | 1     | 10        | 100  | 100                    |
| <b>3<sup>5</sup></b>   | 1/10/10000   | 120    | 20      | 1     | 52        | 5200 | 5200                   |
| <b>4<sup>6</sup></b>   | 1/4/4000     | 100    | 20      | 6     | 27        | 1080 | 180                    |
| <b>5<sup>7</sup></b>   | 1/1/100      | 100    | 15      | 1     | 100       | 100  | 100                    |
| <b>6<sup>8</sup></b>   | 1/4/4000     | 100    | 20      | 6     | 87        | 3160 | 580                    |
| <b>7<sup>9</sup></b>   | 1/5/100      | 25     | 10      | 18    | 88        | 88   | 5                      |
| <b>8<sup>10</sup></b>  | 1/10/200     | 25     | 2       | 18    | 74        | 148  | 8                      |
| <b>9<sup>11</sup></b>  | 1/0/200      | 80     | 35      | 20    | 69        | 690  | 34.5                   |
| <b>10<sup>11</sup></b> | 1/0/200      | 80     | 35      | 20    | 92        | 184  | 9                      |
| <b>11<sup>12</sup></b> | 1/1/1000     | 100    | 40      | 2     | 91        | 910  | 455                    |

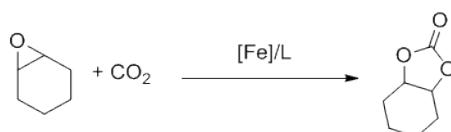

| Entry                  | Fe/co-cat/CHO | T (°C) | p (bar) | t (h) | Conv. (%) | TON  | TOF (h <sup>-1</sup> ) |
|------------------------|---------------|--------|---------|-------|-----------|------|------------------------|
| <b>12<sup>1</sup></b>  | 1/0/10000     | 80     | 10      | 24    | 25        | 2570 | 107                    |
| <b>13<sup>13</sup></b> | 1/10/200      | 85     | 80      | 3     | 94        | 188  | 62                     |

<sup>a</sup>Conditions: 100 ml stainless steel autoclaves, 20 bar CO<sub>2</sub> pressure, 120°C, neat. Conversion was determined using <sup>1</sup>H NMR spectra of crude reaction mixtures.

## 7. Lower temperature CO<sub>2</sub>/propylene oxide coupling experiments

**Table S3** Synthesis of propylene carbonate catalysed by complex **C3** at 100°C.

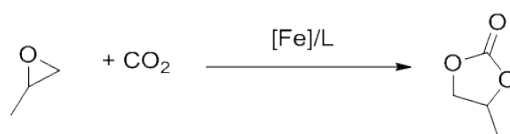

| Entry          | Fe/co-cat/PO | co-cat | T (°C) | p (bar) | t (h) | Conv. (%) | TON  | TOF (h <sup>-1</sup> ) | TOF/[Fe] (h <sup>-1</sup> ) |
|----------------|--------------|--------|--------|---------|-------|-----------|------|------------------------|-----------------------------|
| 1 <sup>8</sup> | 1/4/4000     | TBABr  | 100    | 20      | 6     | 87        | 3480 | 580                    | 290                         |
| 2              | 1/4/4000     | TBAI   | 100    | 20      | 6     | 34        | 1360 | 227                    | 227                         |
| 3              | 1/4/4000     | TBABr  | 100    | 20      | 6     | 47        | 1880 | 313                    | 313                         |

Conditions: 100 ml stainless steel autoclaves, 20 bar CO<sub>2</sub> pressure, 100°C, neat. Conversion was determined using <sup>1</sup>H NMR spectra of crude reaction mixtures.

## 8. Kinetic data for the synthesis of propylene carbonate catalysed by **C3**.

**Table S4** Synthesis of propylene carbonate catalysed by complex **C3** with 2000 and 10000 equivalents of substrate.

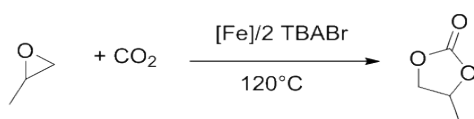

| Entry | t (h) | [PO]/[Fe] | Conv. (%) | TON  | TOF (h <sup>-1</sup> ) |
|-------|-------|-----------|-----------|------|------------------------|
| 1     | 1     | 2000      | 44        | 880  | 880                    |
| 2     | 2     | 2000      | 51        | 1020 | 510                    |
| 3     | 3     | 2000      | 64        | 1280 | 427                    |
| 4     | 4.5   | 2000      | 74        | 1480 | 329                    |
| 5     | 6     | 2000      | 85        | 1700 | 283                    |
| 6     | 2     | 10000     | 11        | 1100 | 550                    |
| 7     | 4     | 10000     | 20        | 2000 | 500                    |
| 8     | 8     | 10000     | 41        | 4100 | 513                    |
| 9     | 16    | 10000     | 53        | 5300 | 331                    |
| 10    | 20    | 10000     | 55        | 5500 | 275                    |
| 11    | 26    | 10000     | 63        | 6300 | 242                    |

Conditions: 100 ml stainless steel autoclaves, 20 bar CO<sub>2</sub> pressure, 120°C, neat. Conversion was determined using <sup>1</sup>H NMR spectra of crude reaction mixtures.

## 9. Catalyst decomposition studies *via* FT-IR spectroscopy

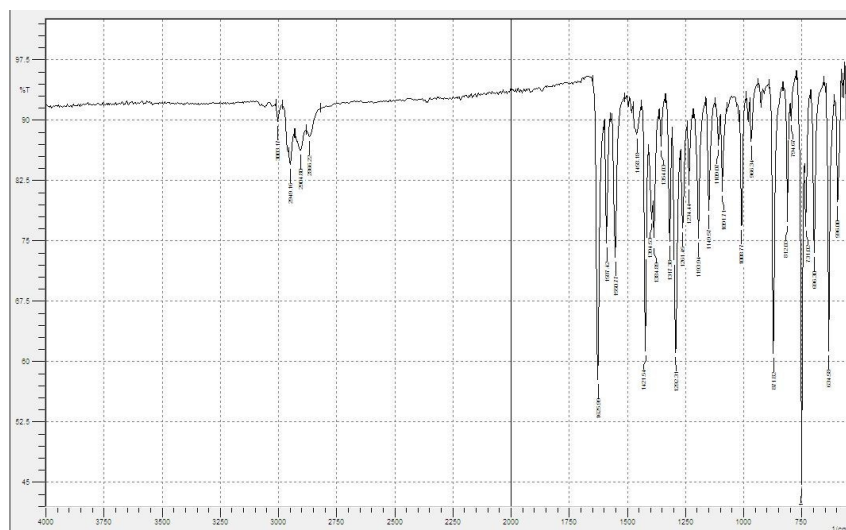

Figure S16 FT-IR spectrum of **C3** catalyst complex.

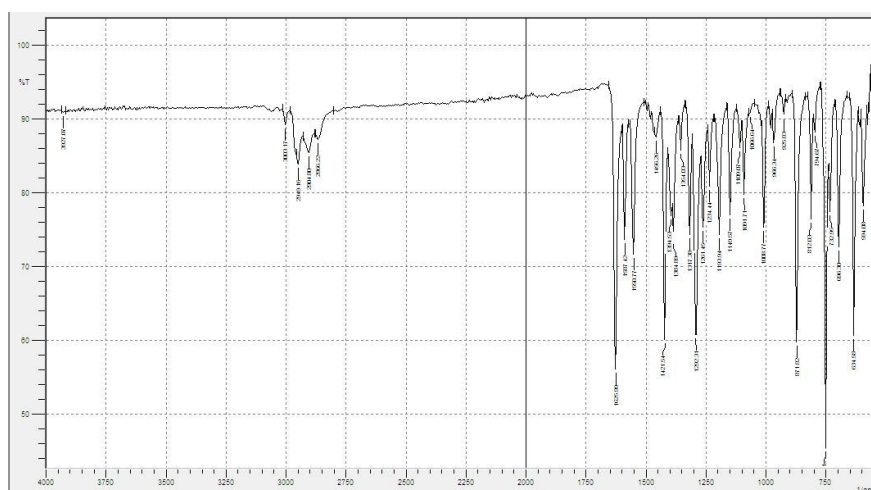

Figure S17 FT-IR spectrum of **C3** after stirring in water for 1 hour at ambient temperature, with subsequent removal of the water under vacuum. No new -OH resonance was observed, and the resonances from **C3** remain consistent between the two spectra.

## 10. X-ray data for Complexes C1 – C3

### C1

$C_{16}H_{16}ClFeN_2O_2$ ,  $M = 359.61$ ,  $T = 120$  K, monoclinic, space group  $I2/a$ ,  $a = 12.5989(3)$ ,  $b = 7.39494(17)$ ,  $c = 17.7897(5)$  Å,  $\beta = 108.536(3)^\circ$ ,  $V = 1571.44(7)$  Å<sup>3</sup>,  $Z = 4$ , 19409 measured reflections, 2808 ( $R_{int} = 0.0288$ ) unique, final  $R_1 = 0.0298$  (all data).

The average of the equatorial angles [Cl1-Fe1-O1, 119.50°; Cl1-Fe1-O1', 119.50°; O1-Fe1-O1', 121.00°] is 120.00°, which corresponds to 100% equatorial trigonal bipyramidal character (TBP<sub>e</sub>).<sup>14</sup> Defined by apical-to-equatorial bonds [N1-Fe1-O1, 90.28°; N1-Fe1-O1', 88.46°; N1-Fe1-Cl1, 91.28°], the axial trigonal bipyramidal character (TBP<sub>a</sub>) is also high at 99.97%.

## C2

$C_{55}H_{72}Cl_2Fe_2N_4O_4$ ,  $M = 1035.80$ ,  $T = 120$  K, monoclinic, space group  $P2_1/c$ ,  $a = 10.8856(3)$ ,  $b = 24.3385(7)$ ,  $c = 19.8618(7)$  Å,  $\beta = 91.003(3)^\circ$ ,  $V = 5261.3(3)$  Å<sup>3</sup>,  $Z = 4$ , 12233 measured reflections, 10913 [ $R_{int} = 0.1307$ ] unique reflections, final  $R_1 = 0.1281$  (all data).

The average of the equatorial angles [Cl1-Fe1-O1, 116.07°; Cl1-Fe1-O2, 119.34°; O1-Fe1-O1', 124.60°] is 120.00°, which corresponds to 100% equatorial trigonal bipyramidal character (TBP<sub>e</sub>).<sup>14</sup> Defined by apical-to-equatorial bonds [N1-Fe1-O1, 87.50°; N1-Fe1-O2, 87.60°; N1-Fe1-Cl1, 93.55°], the axial trigonal bipyramidal character (TBP<sub>a</sub>) is also high at 97.69%.

## C3

$C_{16}H_{14}Cl_3FeN_2O_2$ ,  $M = 428.49$ ,  $T = 120$  K, monoclinic, space group  $C2/c$ ,  $a = 23.1547(3)$ ,  $b = 12.00241(14)$ ,  $c = 12.99462(16)$  Å,  $\beta = 102.4166(12)^\circ$ ,  $V = 3526.89(7)$  Å<sup>3</sup>,  $Z = 8$ , 27812 measured reflections, 3677 [ $R_{int} = 0.0700$ ] unique, final  $R_1 = 0.0431$  (all data).

The average of the equatorial angles [Cl1-Fe1-O1, 117.12°; Cl1-Fe1-O2, 121.11°; O1-Fe1-O2, 121.78°] is 120.00°, which corresponds to 99.97% equatorial trigonal bipyramidal character (TBP<sub>e</sub>).<sup>14</sup> Defined by apical-to-equatorial bonds [N1-Fe1-O2, 89.00°; N1-Fe1-O1, 88.64°; N1-Fe1-Cl1, 92.25°], the axial trigonal bipyramidal character (TBP<sub>a</sub>) is also high at 99.79%.

**Table S2** Crystallographic data and refinement details for **C1**, **C2** and **C3** (CCDC reference numbers 1855808-1855810).

| Identification code                         | <b>C1</b>                                          | <b>C2</b>                                           | <b>C3</b>                                          |
|---------------------------------------------|----------------------------------------------------|-----------------------------------------------------|----------------------------------------------------|
| Empirical formula                           | $C_{16}H_{16}ClFeN_2O_2$                           | $C_{55}H_{72}Cl_2Fe_2N_4O_4$                        | $C_{16}H_{14}Cl_3FeN_2O_2$                         |
| Formula weight                              | 359.61                                             | 1035.80                                             | 428.49                                             |
| Temperature/K                               | 120.00                                             | 120.00                                              | 120.00                                             |
| Crystal system                              | monoclinic                                         | monoclinic                                          | monoclinic                                         |
| Space group                                 | $I2/a$                                             | $P2_1/c$                                            | $C2/c$                                             |
| $a/\text{Å}$                                | 12.5989(3)                                         | 10.8856(3)                                          | 23.1547(3)                                         |
| $b/\text{Å}$                                | 7.39494(17)                                        | 24.3385(7)                                          | 12.00241(14)                                       |
| $c/\text{Å}$                                | 17.7897(5)                                         | 19.8618(7)                                          | 12.99462(16)                                       |
| $\alpha/^\circ$                             | 90                                                 | 90                                                  | 90                                                 |
| $\beta/^\circ$                              | 108.536(3)                                         | 91.003(3)                                           | 102.4166(12)                                       |
| $\gamma/^\circ$                             | 90                                                 | 90                                                  | 90                                                 |
| Volume/Å <sup>3</sup>                       | 1571.44(7)                                         | 5261.3(3)                                           | 3526.89(7)                                         |
| Z                                           | 4                                                  | 4                                                   | 8                                                  |
| $\rho_{calc}/\text{cm}^3$                   | 1.520                                              | 1.3075                                              | 1.614                                              |
| $\mu/\text{mm}^{-1}$                        | 1.137                                              | 5.730                                               | 11.142                                             |
| F(000)                                      | 740.0                                              | 2191.2                                              | 1736.0                                             |
| Crystal size/mm <sup>3</sup>                | 0.377 × 0.295 × 0.217                              | 0.458 × 0.170 × 0.017                               | 0.092 × 0.075 × 0.05                               |
| Radiation                                   | MoK $\alpha$ ( $\lambda = 0.71073$ )               | Cu K $\alpha$ ( $\lambda = 1.54184$ )               | CuK $\alpha$ ( $\lambda = 1.54184$ )               |
| 2 $\theta$ range for data collection/°      | 6.016 to 65.776                                    | 7.26 to 152.04                                      | 7.82 to 152.05                                     |
| Reflections collected                       | 19409                                              | 12233                                               | 27812                                              |
| Independent reflections                     | 2808 [ $R_{int} = 0.0288$ , $R_{sigma} = 0.0191$ ] | 10913 [ $R_{int} = 0.1307$ , $R_{sigma} = 0.1073$ ] | 3677 [ $R_{int} = 0.0700$ , $R_{sigma} = 0.0331$ ] |
| Data/restraints/parameters                  | 2808/0/102                                         | 10913/0/622                                         | 3677/0/219                                         |
| Goodness-of-fit on $F^2$                    | 1.097                                              | 1.057                                               | 1.032                                              |
| Final R indexes [ $I \geq 2\sigma(I)$ ]     | $R_1 = 0.0271$ , $wR_2 = 0.0676$                   | $R_1 = 0.0969$ , $wR_2 = 0.2437$                    | $R_1 = 0.0406$ , $wR_2 = 0.1070$                   |
| Final R indexes [all data]                  | $R_1 = 0.0298$ , $wR_2 = 0.0690$                   | $R_1 = 0.1281$ , $wR_2 = 0.2660$                    | $R_1 = 0.0431$ , $wR_2 = 0.1093$                   |
| Largest diff. peak/hole / e Å <sup>-3</sup> | 0.49/-0.22                                         | 1.29/-1.18                                          | 0.40/-0.58                                         |

## 11. References

1. Buchard, A.; Kember, M. R.; Sandeman, K. G.; Williams, C. K., *Chem. Comm.* **2011**, 47 (1), 212-214.
2. Wu, G.-P.; Wei, S.-H.; Ren, W.-M.; Lu, X.-B.; Xu, T.-Q.; Darensbourg, D. J., *J. Am. Chem. Soc.* **2011**, 133 (38), 15191-15199.
3. Garden, J. A.; Saini, P. K.; Williams, C. K., *J. Am. Chem. Soc.* **2015**, 137 (48), 15078-15081.
4. Della Monica, F.; Maity, B.; Pehl, T.; Buonerba, A.; De Nisi, A.; Monari, M.; Grassi, A.; Rieger, B.; Cavallo, L.; Capacchione, C., *ACS Catalysis* **2018**, 8 (8), 6882-6893.
5. Della Monica, F.; Vummaleti, S. V. C.; Buonerba, A.; Nisi, A. D.; Monari, M.; Milione, S.; Grassi, A.; Cavallo, L.; Capacchione, C., *Adv. Synth. Catal.* **2016**, 358 (20), 3231-3243.
6. Alhashmialameer, D.; Collins, J.; Hattenhauer, K.; Kerton, F. M., *Cat. Sci. Technol.* **2016**, 6 (14), 5364-5373.
7. Dengler, J. E.; Lehenmeier, M. W.; Klaus, S.; Anderson, C. E.; Herdtweck, E.; Rieger, B., *Eur. J. Inorg. Chem.* **2011**, 2011 (3), 336-343.
8. Buonerba, A.; De Nisi, A.; Grassi, A.; Milione, S.; Capacchione, C.; Vagin, S.; Rieger, B., *Cat. Sci. Tech.* **2015**, 5 (1), 118-123.
9. Whiteoak, C. J.; Gjoka, B.; Martin, E.; Belmonte, M. M.; Escudero-Adán, E. C.; Zonta, C.; Licini, G.; Kleij, A. W., *Inorg. Chem.* **2012**, 51 (20), 10639-10649.
10. Whiteoak, C. J.; Martin, E.; Belmonte, M. M.; Benet-Buchholz, J.; Kleij, A. W., *Adv. Synth. Catal.* **2012**, 354 (2-3), 469-476.
11. Fuchs, M. A.; Zevaco, T. A.; Ember, E.; Walter, O.; Held, I.; Dinjus, E.; Doring, M., *Dalton Trans.* **2013**, 42 (15), 5322-5329.
12. Sheng, X.; Qiao, L.; Qin, Y.; Wang, X.; Wang, F., *Polyhedron* **2014**, 74, 129-133.
13. Whiteoak, C. J.; Martin, E.; Escudero-Adán, E.; Kleij, A. W., *Adv. Synth. Catal.* **2013**, 355 (11-12), 2233-2239.
14. Tamao, K.; Hayashi, T.; Ito, Y.; Shiro, M., *Organometallics* **1992**, 11 (6), 2099-2114.
